1 ***De novo* brain-computer interfacing deforms manifold of**  
2 **populational neural activity patterns in human cerebral cortex**

3

4 **Authors**

5 Seitaro Iwama<sup>1,2</sup>, Zhang Yichi<sup>1</sup>, Junichi Ushiba<sup>3\*</sup>

6

7 **Affiliations**

8 <sup>1</sup>School of Fundamental Science and Technology, Graduate School of Keio  
9 University, Kanagawa, Japan; <sup>2</sup>Japan Society for the Promotion of Science,  
10 Tokyo, Japan; <sup>3</sup>Department of Biosciences and informatics, Faculty of Science  
11 and Technology, Keio University, Kanagawa, Japan

12

13 **\*Correspondence**

14 Junichi Ushiba, Ph.D.

15 Department of Biosciences and Informatics, Faculty of Science and Technology,  
16 Keio University, 3-14-1 Hiyoshi, Kouhoku-ku, Yokohama, Kanagawa 223-8522,  
17 Japan.

18 Tel/Fax: +81-45-566-1678.

19 Email: [ushiba@bio.keio.ac.jp](mailto:ushiba@bio.keio.ac.jp)

20

21 **Abstract**

22 Human brains are capable of modulating innate activities to adapt to novel  
23 environmental stimuli; for sensorimotor cortices (SM1) this means acquisition of  
24 a rich repertoire of motor behaviors. We investigated the adaptability of human  
25 SM1 motor control by analyzing net neural population activity during the learning  
26 of brain-computer interface (BCI) operations. We found systematic interactions  
27 between the neural manifold of cortical population activities and BCI classifiers;  
28 the neural manifold was stretched by rescaling motor-related features of  
29 electroencephalograms with model-based fixed classifiers, but not with adaptive  
30 classifiers that were constantly recalibrated to user activity. Moreover, operation  
31 of a BCI based on a *de novo* classifier with a fixed decision boundary based on  
32 biologically unnatural features, deformed the neural manifold to be orthogonal to  
33 the boundary. These principles of neural adaptation at a macroscopic level may  
34 underlie the ability of humans to learn wide-ranging behavioral repertoires and  
35 adapt to novel environments.

36 **Keywords**

37 brain-computer interface (BCI), nonlinear dimensionality reduction, sensorimotor  
38 activity, *de novo* learning, neural plasticity

39

Brain-computer interfacing with scalp EEG Visualization of cortical adaptation in embedded space

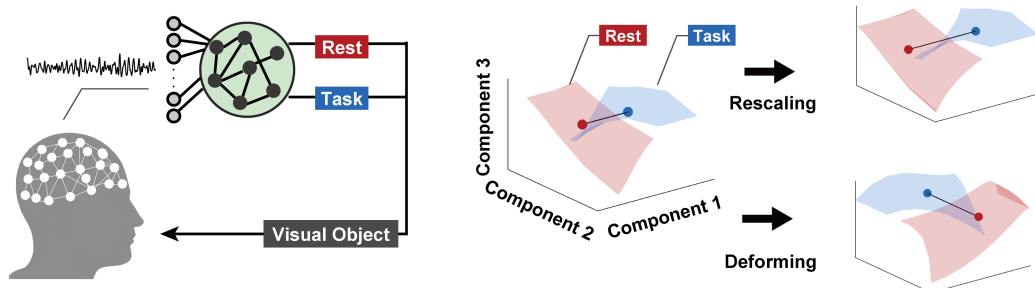

40

41

## 42 1 Introduction

43 Neural plasticity underlies behavioral adaptation to the external environment by  
44 changing properties of neural circuitries involved in, for example, dexterous motor  
45 behaviors, such as sports, musical performance, tool-use, or brain-computer  
46 interface (BCI) operations (Imamizu et al., 2000; Nudo et al., 1996; Quallo et al.,  
47 2009). The adaptation processes to achieve purposeful physical movement have  
48 been examined by electrophysiology, neuroimaging, and behavioral approaches  
49 (Karni et al., 1995; Kleim et al., 2004; Kording et al., 2007; Nudo et al., 1996;  
50 Shadmehr & Mussa-Ivaldi, 1994).

51 In sensorimotor studies leveraging neural activity recordings, local neuronal  
52 circuitries display repertoires of firing patterns that reliably represent ongoing  
53 behavior (Gallego et al., 2018; Shenoy & Kao, 2021). This representation of  
54 covariance structure has been referred to as the neural manifold, and intriguing  
55 findings suggest that the brain is capable of rapidly learning patterns of spike  
56 activities inside the manifold but not those outside of it (Sadler et al., 2014).  
57 These constraints to learning, which are putatively due to the microscopic  
58 configuration of neurons, illustrate realistic behavior as well as the BCI control on  
59 which neural activities and behavioral consequences are directly mapped.

60 While a neural manifold describes the constraints on the ensemble of local  
61 neural activities in which hundreds of neurons are implicated, what is less  
62 investigated are the constraints on the macroscopic neural system. Because the  
63 brain exerts information processing via not only local circuitry but also the inter-  
64 regional coupling by which macroscopic neural populations selectively  
65 communicate (Bassett et al., 2015), those implicated in coherent communication  
66 might also be constrained similarly to the local circuitries (Fries, 2005, 2015).

67 To characterize the constraints on cortical population activities during  
68 adaptation, we used BCIs based on scalp electroencephalograms (EEG) with a  
69 variety of incorporated classifiers (Figure 1).

70 **Figure 1**

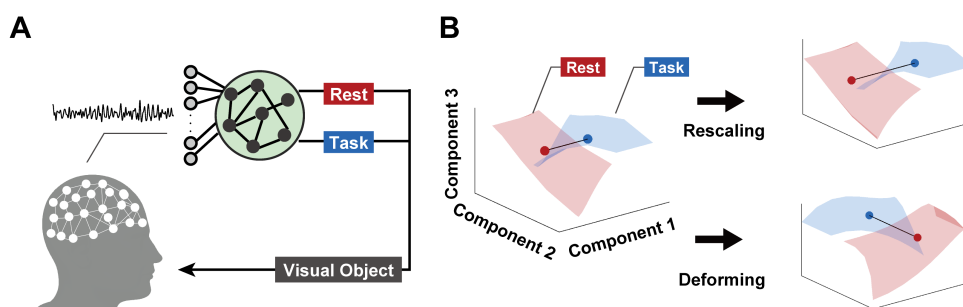

72 Users attempted to move a virtual object using mental actions that modulated  
73 EEG signals. For each user, one of three classifiers determined the movement of  
74 objects based on a different set of rules. The model-based classifier required  
75 voluntary attenuation of sensorimotor rhythm (SMR) power derived from  
76 sensorimotor cortex (SM1). This fixed BCI operation rule is consistent with  
77 physiological findings, as the attenuation of SMR reflects SM1 excitability (Naros  
78 et al., 2019; Pfurtscheller & Lopes Da Silva, 1999; Takemi et al., 2013), as well  
79 as functional coupling among sensorimotor-related regions (Hayashi et al., 2020;  
80 Schulz et al., 2014; Tomassini et al., 2020; Wander et al., 2013). The adaptive  
81 classifier based on machine learning algorithms was configured based on recent  
82 whole-head EEG activity patterns to achieve maximum BCI controllability. This  
83 data-driven classifier configuration entails adaptive weighting on signaling  
84 features implicated in not only sensorimotor, but also attentional or cognitive  
85 functions in which the front-parietal network is implicated (Corsi et al., 2020).  
86 Lastly, the *de novo* classifier had a fixed configuration based on a biologically  
87 unnatural feature – desynchronized alpha oscillations derived from parietal  
88 regions. Due to the absence of prior knowledge to control this feature, users were  
89 encouraged to explore mental actions to control a visual object in the given BCI  
90 framework (Fujisawa et al., 2019).

91 As the decision boundaries between resting and motor attempts for each of the  
92 three classifiers (classifier plane) differed in their configurations, cortical  
93 adaptation processes were investigated by t-distributed stochastic neighbor  
94 embedding (t-SNE) algorithms, a nonlinear dimensionality reduction to visualize  
95 the distinct geometric changes of a whole-head EEG signal during  
96 operating/learning BCI tasks (Van Der Maaten & Hinton, 2008).

97

## 98 **2 Results**

99

### 100 **2.1 Score acquisition during brain-computer interfacing**

101 Twenty-one participants operated BCIs with one of three randomly allocated  
102 classifiers that provided scores contingent on BCI performance (Figure 2,  
103 Figure 2–supplement 1, 2). While BCI performance scores from the model-based  
104 and adaptive classifier generally increased over sessions, those for the *de novo*  
105 classifier did not. Statistical tests for coefficient of linear regression acquired from  
106 each participant revealed significant differences from zero for BCIs based on the  
107 model-based and adaptive classifiers (model-based:  $p = 0.0078$ , adaptive:  $p =$

108 0.023, *de novo*:  $p = 0.055$ , Wilcoxon rank-sum test, FDR corrected). Note that  
109 direct comparison of the coefficients among classifiers is not possible because  
110 scores from each classifier were computed based on different classifiers.

111

112 **Figure 2**

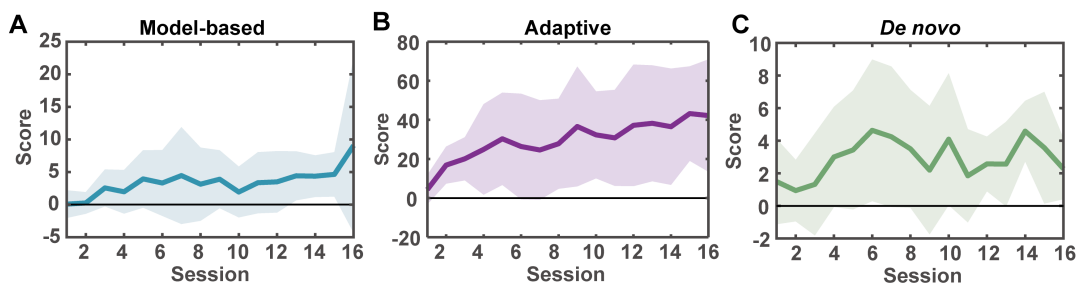

113

114

115

116 **Figure 2 Supplement 1**

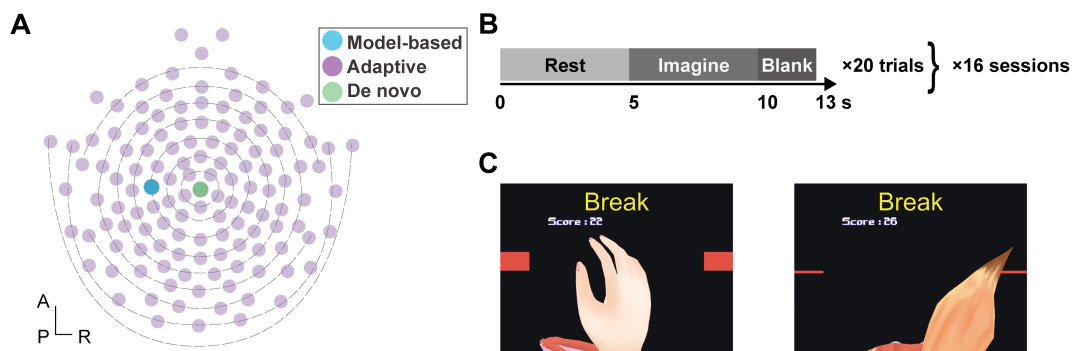

117

118

119 **Figure 2 Supplement 2**

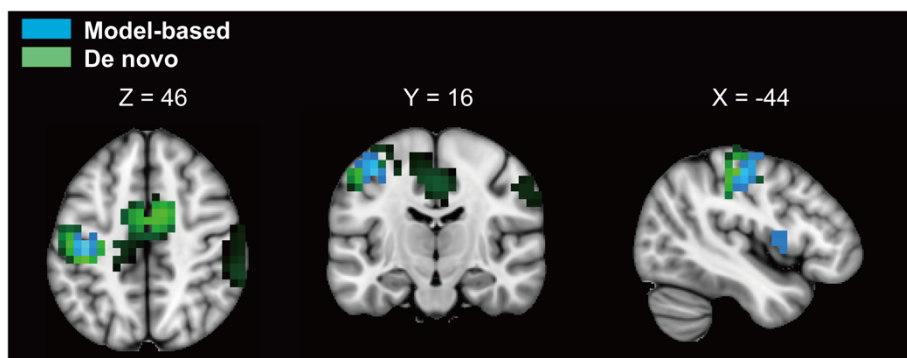

120

121

122 **2.2 Quantification of cortical adaptation process to classifier's separating**  
123 **plane**

124 To examine differences in cortical adaptation processes, we next investigated  
125 changes in whole-head EEG signals (Figure 3A). Using band-power features as  
126 a representation of brain state, all data acquired from a single experiment were  
127 subjected to the t-SNE algorithm to evaluate geometric relationships among two  
128 brain states (i.e., resting and attempted movement) and the classifier plane in the  
129 embedded space.

130

131 **Figure 3**

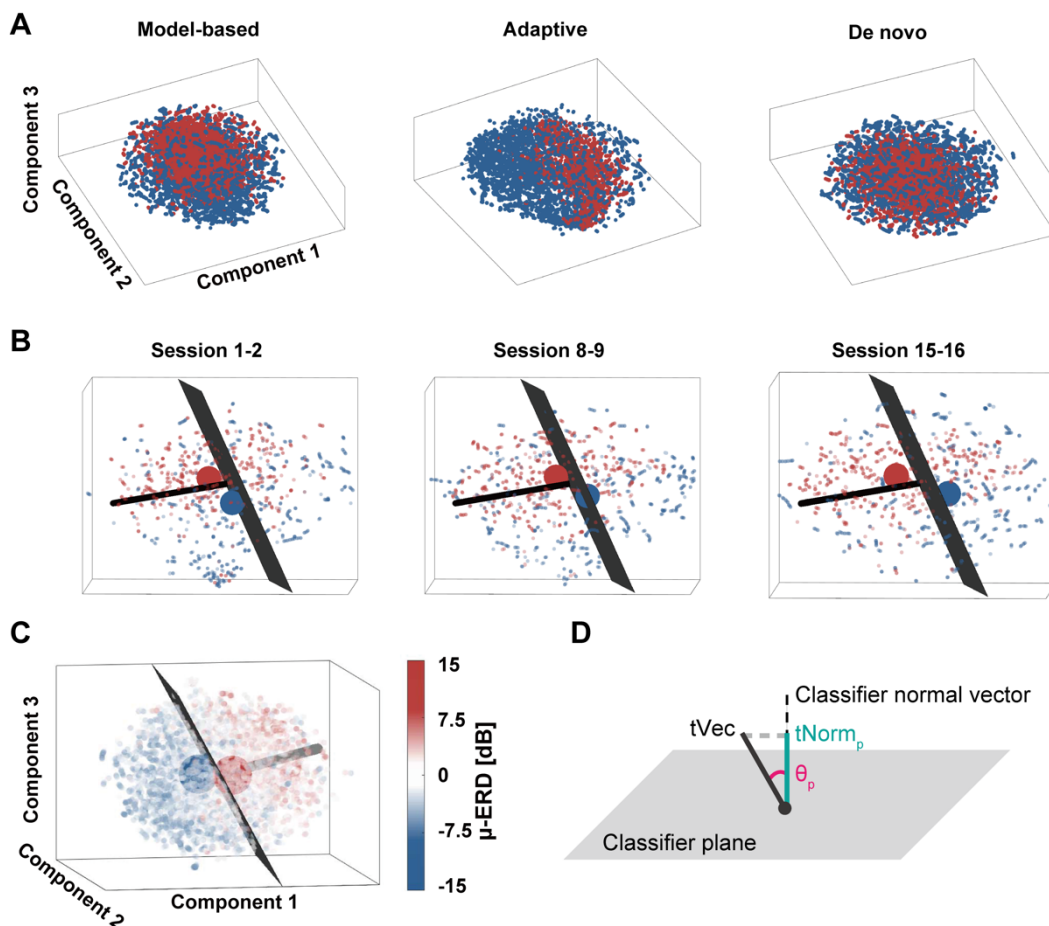

132

133

134 An example of data from the model-based classifier BCI is shown in Figure 3B.  
135 As the participant performed the BCI operation, data during attempted movement  
136 (blue points) moved across the classifier plane, where the sign of relative SMR

137 power flips (Figure 3C). In this case, the defined metrics  $tNorm_p$  and  $\theta_p$   
138 (Figure 3D) increased and decreased, respectively.

139 Figure 4A depicts changes in  $tNorm_p$  and  $\theta_p$  between the first and last four  
140 sessions in the experiment. For participants trained with the model-based  
141 classifier,  $tNorm_p$  values significantly increased ( $p = 0.016$ ,  $d = 0.71$ , two-tailed  
142 Wilcoxon signed-rank test) and the change was specific to participants who  
143 operated with model-based classifiers (Figure 4–supplement 1A,  $p = 0.81$ ,  $0.047$ ).  
144 At the same time,  $\theta_p$  values decreased significantly for participants trained with  
145 both the model-based and *de novo* classifiers ( $p = 0.016$ ,  $d = 0.77$ ,  $p = 0.016$ ,  $d$   
146  $= 1.0$ , respectively, Figure 4–supplement 1B), but not with the adaptive classifiers  
147 (Figure. 4C;  $p = 0.58$ ).

148

149 **Figure 4**

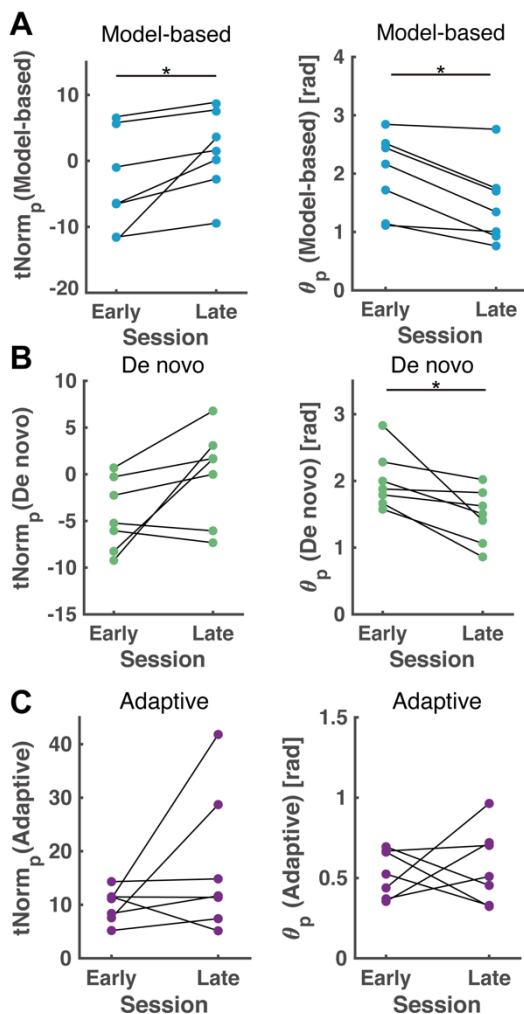

150

151 **Figure 4 Supplement 1**

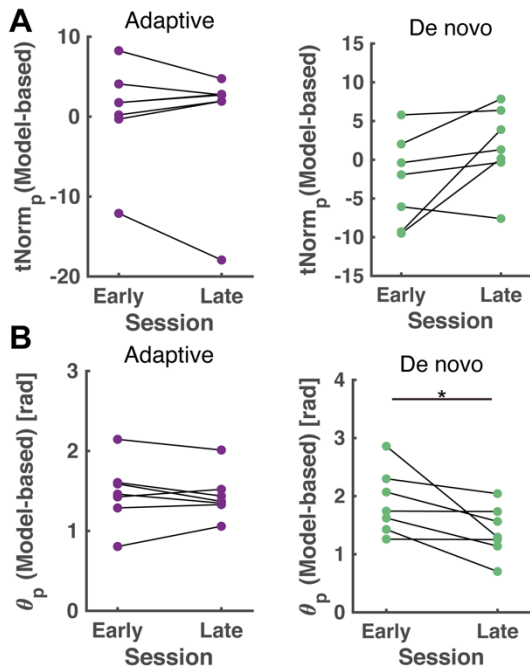

152

153

154 **Figure 4 Supplement 2**

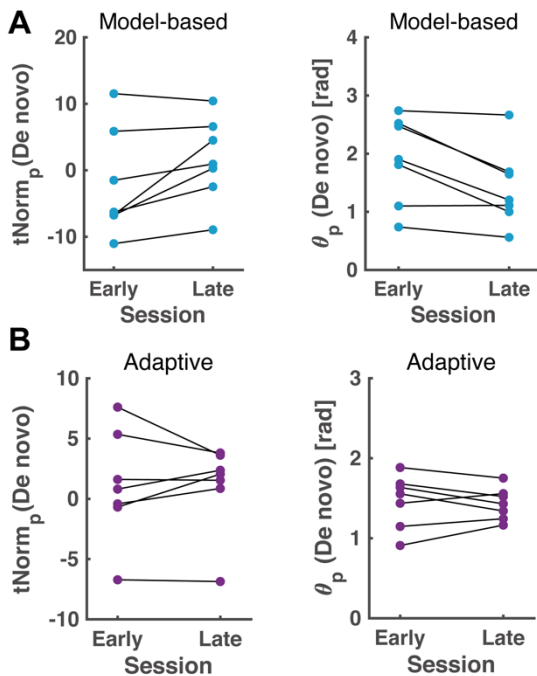

155



156 **Figure 4 Supplement 3**

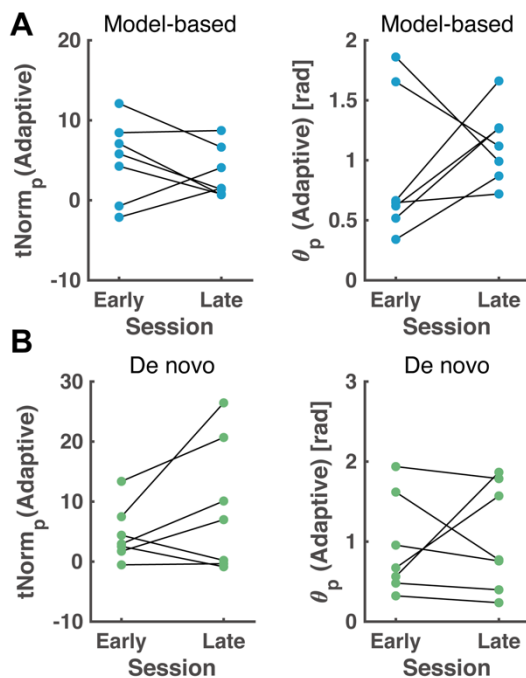

157

158 The identical evaluation was conducted for the *de novo* classifier plane.  
159 Figure 4B depicts changes in  $tNorm_p$  and  $\theta_p$  against the *de novo* classifier.  
160 While no significant differences were confirmed for  $tNorm_p$  values over  
161 sessions ( $p = 0.078$ ),  $\theta_p$  values decreased significantly ( $p = 0.016$ ,  $d = 1.3$ ).  
162 Neither  $tNorm_p$  nor  $\theta_p$  changed with respect to the other two classifiers  
163 (Figure 4–supplement 2, model-based:  $p = 0.047$ ,  $0.031$ , adaptive:  $p = 1$ ,  $0.58$ ,  
164  $tNorm_p$  and  $\theta_p$ , respectively).

165 As the classifier planes changed from one session to the next for the adaptive  
166 classifiers trained with the data from the previous sessions, each metric was  
167 calculated against the classifier plane determined with the dataset from the  
168 previous session. No significant differences were confirmed for comparison  
169 between the early and late period for the adaptive classifier (Figure 4C,  
170 supplement 3).

171

### 172 **3 Discussion**

173 In the present study, participants performed BCI operations with one of three  
174 classifiers: model-based, adaptive, or *de novo*. Each classifier elicited a different  
175 cortical adaptation process consistent with their characteristics. t-SNE analyses  
176 in embedded space revealed increases in  $tNorm_p$  for the model-based classifier,

177 indicating rescaling of the neural manifold with respect to the axes orthogonal to  
178 the fixed decision boundary. Meanwhile, changes in population activities were not  
179 induced by the adaptive classifiers; decreases in  $\theta_p$  indicated that the manifold  
180 was deformed, resulting in a reconfiguration orthogonal to its classifier plane by  
181 the *de novo* classifier that was based on biologically unnatural features.  
182

### 183 **3.1 Tuning classifiers to a brain induced by adaptive algorithm**

184 Both the model-based and adaptive classifiers elicited short-term learning of the  
185 BCI operations as evidenced by the increases in performance scores; however,  
186 these two processes were distinct from one another. While model-based  
187 classifiers elicited changes in  $tNorm_p$  and  $\theta_p$ , the adaptive classifiers did not.  
188 Such a difference might be attributed to the design of the classifiers, as the mental  
189 actions that users were instructed to perform were identical. During BCI  
190 operations with a constant classifier plane, participants honed their abstract  
191 ability to control sensorimotor activity by minimizing error between the current  
192 classified result and their intended mental action; however, in the case of the  
193 adaptive classifiers, adaptation of users to the classifier was putatively limited  
194 due to the session-by-session recalibration.

195 Despite the absence of cortical adaptation to the classifier plane for users of  
196 the adaptive classifiers, performance scores did increase incrementally  
197 throughout the experiment. Accordingly, we can only posit that the adaptation of  
198 classifiers to users systematically progressed across sessions. It should be noted  
199 that implementing the adaptive algorithm might induce suboptimal results when  
200 the objective of the BCI operation is the induction of a specific neural activity,  
201 such as changes in excitability, activity patterns, or connectivity of targeted  
202 regions (Ramot et al., 2017; Ruddy et al., 2018; Shibata et al., 2011).

203

### 204 **3.2 Cortical adaptation process during *de novo* brain-computer interfacing**

205 Although significant increases in performance scores and  $tNorm_p$  were not  
206 confirmed for the *de novo* classifiers, cortical adaptations towards the classifier  
207 plane were partly observed, as evidenced by the decreases in  $\theta_p$ . The *de novo*  
208 task was defined as one that participants work on to improve their performance  
209 without any prior knowledge or strategy (Choi et al., 2020; Fujisawa et al., 2019;  
210 Radhakrishnan et al., 2008; Telgen et al., 2014). To achieve this during brain-  
211 computer interfacing, neurofeedback was provided via an illustrated tail. Because  
212 movement of a tail is not inherent for humans, participants were instructed to

213 explore possible mental actions that might be suitable for operation. As such an  
214 exploratory strategy might require more extensive training than recalibrating the  
215 existing control configuration, performance scores did not tend to progress within  
216 a single-day experiment (Choi et al., 2020; Telgen et al., 2014).

217 The neural adaptation process was visualized via the t-SNE-based analysis.  
218 Deforming effects, that is rotational changes in the geometric relationship of two  
219 brain states towards the classifier plane, were confirmed in participants using the  
220 *de novo* classifier. However, the absence of a significant scaling effect suggested  
221 that the dissection of the two conditions (resting and motor imagery) did not  
222 systematically progress; this observation might reflect the reassociation of  
223 existing activity patterns to adapt to the BCI classifier by exploring a strategy to  
224 control the object. The result is consistent with the time course of the performance  
225 score and possible necessity of multi-day training to affect substantial behavioral  
226 improvement in *de novo* learning (Choi et al., 2020; Fujisawa et al., 2019).  
227 Although the flexibility of the human brain enabled partial adaptation to the *de*  
228 *novo* classifier planes, the adaptive classifier did not elicit brain-side adaptation.  
229 These findings collectively suggest that fixation of the classifier plane is an  
230 essential element for inducing neural plasticity via a brain-computer interaction  
231 based on macroscopic neural population activity.

232

## 233 **4 Material and Methods**

234

### 235 **4.1 Participants**

236 Twenty-one neurologically healthy adults (9 females, 12 males, mean age: 22.6  
237  $\pm$  3.23) who had never operated a BCI participated in this experiment. The  
238 appropriate sample size for this study was determined by an a-priori power  
239 analysis ( $\alpha$  = 0.05,  $1-\beta$  = 0.8, two-sided Wilcoxon signed-rank tests) focusing on  
240 the deforming effect induced by *de novo* BCI. The statistical package G\*Power 3  
241 (Faul et al, 2007) was used to estimate the sample size that shows large Cohen's  
242  $d$  = 0.90 reported in the previous EEG-based neurofeedback literatures (Hayashi  
243 et al., 2020; Soekadar et al., 2015). We calculated that 7 participants were  
244 needed.

245 All participants had normal or corrected-to-normal vision and were asked to  
246 provide written informed consent before participating in the experiment. This  
247 study was conducted according to the ethics of the Declaration of Helsinki. The

248 experimental protocol was approved by the ethical committee of the Faculty of  
249 Science and Technology, Keio University (Approval Number: 2020-36, 31-23).

250

## 251 **4.2 Experimental setup**

252 Participants were seated on a comfortable chair in a quiet room. A display was  
253 placed about one meter in front of the chair to provide task instructions and visual  
254 feedback from BCIs.

255 EEG signals during the experiment were acquired with a 128-channel  
256 HydroCel Geodesic Sensor Net (HCGSN, EGI, Eugene, OR, USA.). The layout  
257 of channels followed the international 10-10 electrode positions shown in  
258 Figure 2-supplement 1A (Luu & Ferree, 2005). The reference channel was set to  
259 Cz. The impedance of all channels was maintained below 50 k $\Omega$  throughout the  
260 experiment. The EEG data were collected with a sampling rate of 1 kHz and  
261 transmitted via the Ethernet switch Gigabit Web Smart Switch (Black Box,  
262 Pennsylvania, USA) to EEG recording software Net Station 5.2 manufactured by  
263 EGI and MATLAB R2019a (The Mathworks, Inc, Massachusetts, USA).

## 264 **4.3 Online processing of EEG signals**

265 Analytical pipelines for online signal processing were implemented with a  
266 combination of MATLAB and Unity (Ver. 2019.2.4f1, Unity Technologies, USA).  
267 While the real-time status of brain states was determined from EEG signals  
268 processed by a custom MATLAB script, Unity presented the visual neurofeedback  
269 objects. EEG signals were processed with a 1651-point, minimum-phase, FIR 8-  
270 30 Hz bandpass temporal filter and then processed with one of the three types of  
271 BCI classifiers. Online processed EEG signals were used to classify brain-states  
272 as either presence or absence of attempted movement with one of the three types  
273 of classifiers: model-based, adaptive, or *de novo*. Each classifier was designed  
274 with different rules, and electrodes of interest were defined as shown in Figure 2-  
275 supplement 1A.

276 The model-based classifier was constructed based on those used in common  
277 SMR-based BCIs (Buch et al., 2008; Kraus et al., 2016). EEG signals around the  
278 left SM1 (i.e., channel C3) were only used to detect the attempted movement,  
279 because accumulated evidence suggests that event-related desynchronization of  
280 SMR (SMR-ERD) contralateral to the hand that attempted to move reflects the  
281 excitability of SM1 (Hummel et al., 2002; Naros et al., 2019; Takemi et al., 2013).  
282 In online processing, a large Laplacian filter was applied to EEG signals from  
283 channel C3 to extract sensorimotor activity (McFarland et al., 1997; Tsuchimoto

284 et al., 2021). Subsequently, the band power of SMR (SMR-power; 8-13 Hz) was  
285 extracted by Fourier transform with a 1-s window and Hamming window function.  
286 The magnitude of SMR-ERD [dB] was computed from the obtained SMR-power  
287 with the following formula:

$$289 \quad \text{ERD}(t) = -10 \log_{10}(P(t) / P_{Ref})$$

288  
291 where  $P(t)$  denotes the power of interest, here the SMR-power, at time point  $t$ ,  
292 and  $P_{Ref}$  denotes the reference power (Pfurtscheller & Lopes Da Silva, 1999).  
293 The reference power was calculated from the middle 3-s period of “Rest” time  
294 from the previous trial. The online calculated magnitude of SMR-ERD was then  
295 used as the index of neurofeedback for the model-based classifier. Movements  
296 of the illustrated hand in the display and performance scores were defined to be  
297 linearly related to the SMR-ERD value in the range of 0 to 10 dB.

298 The adaptive classifier was constructed using whole-head scalp EEG signals  
299 based on a common spatial pattern (CSP) algorithm and a support vector  
300 machine (SVM) (Blankertz et al., 2007). CSP components were extracted to  
301 maximize the separability of the two conditions Rest and Imagine, and were  
302 quickly trained at the end of each session to adapt to the current activity patterns  
303 of users. Specifically, the CSP was generated from the spatial covariance  
304 matrices of all EEG electrodes to find linear combinations of electrodes to form  
305 spatial filters that maximized the variance difference between the two conditions.  
306 The corresponding variances of spatially filtered EEG data were then divided into  
307 time windows and log-transformed to transform their distribution into a normal  
308 distribution. The SVM classifier was constructed to perform a binary classification  
309 of the two conditions. The posterior probability for a data point classified as  
310 presence of motor attempt was used as an index for neurofeedback; the index  
311 for the adaptive classifier was defined to be linearly related to the posterior  
312 possibility in the range of 50% to 100%. Note that the rules for object movement  
313 were identical to those of the model-based classifier, only the feedback was  
314 different.

315 Lastly, the *de novo* classifier had a fixed classifier plane as did the model-based  
316 classifier; however, its characteristics were biologically unnatural; the *de novo*  
317 classifier was based on EEG signals around the parietal region (i.e., channel Cz)  
318 that are associated with attentional features but not with sensorimotor activity  
319 (Benedek et al., 2014; Misselhorn et al., 2019). During the BCI task, users

320 attempted to move their body or a visual object on the display; however, spectral  
321 power in the alpha-band (8-13 Hz) was increased by the motor attempt of moving  
322 the feet or by internal attention at the targeted channel (Benedek et al., 2014;  
323 Pfurtscheller et al., 2006). Such intrinsic responses did not contribute to the BCI  
324 operation, as the *de novo* classifier discriminated motor attempts with ERD values  
325 (i.e., power attenuation) in the alpha-band from the Cz channel, calculated with  
326 the procedure identical to that from channel C3 in the model-based classifier.  
327 Online computed ERD magnitude was exploited to decode the absence/presence  
328 of attempted movement and index for neurofeedback. Note that the rules for  
329 object movement and for obtaining scores were identical to those in the other two  
330 types of classifiers.

331

#### 332 **4.4 Experimental procedure**

333 Participants underwent 16 BCI operation sessions, each consisting of 20 trials.  
334 All experimental procedures were conducted within 2 hours to guarantee the  
335 reversibility of any potentially unnaturally induced neural plasticity and to  
336 investigate the initial phase of learning to operate the BCIs. After every two  
337 sessions, participants were given a break of up to 5 min. Participants were  
338 randomly allocated to one of the three classifiers without knowledge of their  
339 existence or configuration and used the allocated type of classifier throughout the  
340 entire experiment.

341 A trial began with a 5-s “Rest” period. This was followed by a 5-s “Imagine” and  
342 a 3-s “Break” period (Figure 2 – supplement 1B). During the “Rest” period,  
343 participants were instructed to relax without having any specific thoughts and with  
344 opened eyes. In the “Imagine” period, participants were instructed by the  
345 experimenter to perform motor imagery tasks based on the allocated classifier.  
346 Participants with the model-based and adaptive classifiers were instructed to  
347 imagine extending the right-hand throughout the experiment, matching the  
348 imagined movement with the object on display. Participants with the *de novo*  
349 classifier were instructed to imagine moving a tail, also matching the movement  
350 of the object on display. As tail moving is not intuitive for humans, at the beginning  
351 of the session, participants were encouraged to exploratorily find a strategy that  
352 achieved the best control of the BCI. The strategy adopted in each session was  
353 freely determined by each participant, but they were instructed to try to use the  
354 same strategy throughout one session to acquire sufficient data during a specific  
355 strategy.

356 The performance of each trial was quantified by a score, which participants  
357 were encouraged to make as high as possible. Scores were determined by the  
358 predicted presence/absence of the attempted movement. Both the absence of  
359 attempted movements during “Rest” periods and the presence of attempted  
360 movements during “Imagine” periods resulted in higher scores, while scores were  
361 reduced if movements contrary these predictions were detected. The changing  
362 rates of these scores were pertinent to the metrics used for feedback by each  
363 classifier and were regulated linearly to fit the score range from minus one  
364 hundred to plus one hundred. After each session, participants were asked to  
365 verbally describe the strategies they had adopted.

366 For the adaptive classifier, the CSP-SVM model was re-trained with “Rest” and  
367 “Imagine” period data from the previous session to use in the next session. Note  
368 that the first session of the adaptive classifier task was identical to that of the  
369 model-based one, so as to collect a dataset for constructing the adaptive classifier.  
370 Detailed procedures for classifier training are described in the supplementary  
371 materials.

372

#### 373 **4.5 Evaluation of BCI performance**

374 Online-calculated scores were subjected to linear regression analysis (Gruzelier,  
375 2014; Kober et al., 2018; Witte et al., 2018). The score obtained during a given  
376 session was used as a dependent variable and session number was used as a  
377 predictor valuable. If scores increased during the experiment, the regression  
378 coefficient for the predictor valuable was positive. To test whether the obtained  
379 regression coefficients were significantly different from zero, they were subjected  
380 to a group-by-group Wilcoxon rank-sum test with a false discovery rate correction  
381 (Benjamini-Hochberg method; Benjamini & Hochberg, 1995).

382

#### 383 **4.6 Offline EEG preprocessing**

384 The recorded EEG signals were first preprocessed with EEGLAB (Delorme &  
385 Makeig, 2004) to reject artifacts and enhance the computational efficiency via  
386 downsampling (Bigdely-Shamlo et al., 2015). The raw EEG data were filtered with  
387 a zero-phase 1-45 Hz FIR bandpass filter and down sampled to 100 Hz. Channels  
388 classified as “Bad” by the EEGLAB plugin: Christian's clean\_rawdata (Bigdely-  
389 Shamlo et al., 2015) were removed from further analysis. The removed channels  
390 were interpolated spherically to minimize a potential bias when re-referencing the  
391 electrodes to a common average reference. Subsequently, large-amplitude

392 artifacts caused by blinking or head displacement were removed via Artifact  
393 Subspace Reconstruction (Kothe & Makeig, 2013). The electrodes were then re-  
394 referenced to the common average reference to extract activity specific to the  
395 electrodes (McFarland et al., 1997).

396 The continuous EEG data were then segmented into trials to evaluate the  
397 middle 8-s periods of the online BCI training trials (i.e., the last 4 s of the “Rest”  
398 period and the first 4 s of the “Imagine” period). To obtain the independent EEG  
399 components of the segmented dataset, we used adaptive mixture independent  
400 component analysis (AMICA; Palmer et al., 2011). Finally, an automatic artifact  
401 rejection was applied using ICLabel that distinguished brain-originated EEG  
402 components from artifacts induced by eye, muscle, heart, line noise, and channel  
403 noises (Pion-Tonachini et al., 2019).

404 To investigate cortical adaptation processes during brain-computer interfacing,  
405 the band-power features were used as a raw-vector that represents  
406 instantaneous overall brain state. Computed band-power from each EEG channel  
407 was subdivided into five functionally distinct frequency bands (Delta: 1-4 Hz,  
408 Theta: 4-8 Hz, Alpha: 8-13 Hz, Beta: 13-31 Hz, Gamma: 31-45 Hz; Hayashi et al.,  
409 2019). The averaged band-power was log-transformed and normalized to the z-  
410 score in a trial-by-trial manner to cancel base-line drifting. Thereby, the original  
411 number of dimensions of the feature vector  $D$  was  $D = 129 \times 5 = 645$ . The  
412 calculated band-power signals in the alpha-band also were subjected to cortical  
413 source estimation (See also supplementary materials).

414

#### 415 **4.7 Feature extraction of EEG-dataset using t-SNE algorithm**

416 The preprocessed EEG dataset (645×11520 matrix) was subjected to a subject-  
417 by-subject t-SNE analysis, which converted the pairwise distances between data  
418 points in the original feature space to conditional probabilities (Van Der Maaten  
419 & Hinton, 2008). Mathematical details of t-SNE are further described in the  
420 Supplementary Materials and briefly here. First, the conditional probability that  
421 the data points  $x_i$  and  $x_j$  are neighbors was calculated from the pairwise  
422 distances of input data. Then, to maintain the probabilities in the original feature  
423 space in the embedded space, the Kullback-Leibler divergence representing the  
424 distance between the conditional probability in the original and embedded space  
425 was minimized via optimization. In this study, the number of dimensions of EEG  
426 features was reduced to three via a Barnes-Hut variation of t-SNE (Van Der  
427 Maaten et al., 2014) to speed up the computation. Perplexity, a hyperparameter



428 of the t-SNE algorithm, was set to 20, which was determined empirically with a  
429 parameter search of past EEG data for best separation between the “Rest” and  
430 “Imagine” periods. The hyperparameter was fixed across participants throughout  
431 the study after the determination. After applying t-SNE, the dimensionality-  
432 reduced datasets were subjected to visualization and a similarity analysis.

433

#### 434 **4.8 t-SNE-based dimensionality reduction and quantitative analysis in** 435 **embedded space**

436 Feature extraction using dimensionality reduction is popularly conducted for high-  
437 dimensional neural data across modalities (Cunningham & Yu, 2014; Lord et al.,  
438 2019). The t-SNE algorithm we adopted has advantages for geometric evaluation,  
439 as it preserves original distances in the embedded space. Here, to conduct  
440 quantitative analysis beyond its general purpose for data visualization, we  
441 employed metrics that do not violate the assumption of the t-SNE algorithm.  
442 Feature extraction techniques such as ICA, principal component analysis, or  
443 factor analysis display weighted maps of extracted components so that they can  
444 be applied to newly acquired data, whereas the t-SNE algorithm does not. To  
445 enable interpretation of the dataset with reduced components, in the present  
446 study, entire datasets from individual participants were subjected to t-SNE  
447 analysis at once.

448 Because t-SNE unfolds the nonlinear structure of a given dataset, the linear  
449 distance in the embedded space can be interpreted as an approximation of  
450 geometric distance in the original space. It illustrates how different one brain  
451 activity pattern is from another. It should be noted however that to properly  
452 interpret the results (1) distance scales in the embedded space were rearranged  
453 and were variable across iterations of t-SNE, (2) distance scales in different  
454 clusters might have differed, (3) direct comparisons of distances between clusters  
455 were not acceptable because distances within two clusters were arbitrary. To deal  
456 with the above concerns, two approaches were adopted: (1) data points were  
457 bridged to prevent the formation of multiple clusters, and (2) statistical distances,  
458 namely Hotelling's t-squared statistical values, were used instead of Euclidean  
459 metrics.

460 Because distances between nearby points are well preserved in embedded  
461 space, the distance scale of distant points were kept similar for enough data  
462 points, which acts as a bridge and prevents the formation of sparse multiple  
463 clusters. We also adopted the concept of “short-circuiting” (Lee & Verleysen,

464 2005) by constructing the feature vectors with overlapped time-windows so that  
465 points were smoothly connected. Thus, distances from point to point shared the  
466 same scale across all points (i.e., only one cluster was generated in embedded  
467 space).

468 Hotelling's t-squared statistic was adopted as the distance metrics between two  
469 group of points (Hotelling, 1992). Assume  $x$  and  $y$  are two groups of points lying  
470 in a  $p$ -dimensional space,  $n_x$  and  $n_y$  are the numbers of points,  $\bar{x}$  and  $\bar{y}$  are  
471 the sample means, and  $\hat{\Sigma}_x$  and  $\hat{\Sigma}_y$  are the respective sample covariance  
472 matrices. The Hotelling's t-squared statistic was calculated as:

473

$$474 \quad t^2 = \frac{n_x n_y}{n_x + n_y} (\bar{x} - \bar{y})' \hat{\Sigma}^{-1} (\bar{x} - \bar{y})$$

$$475 \quad \hat{\Sigma} = \frac{(n_x - 1)\hat{\Sigma}_x + (n_y - 1)\hat{\Sigma}_y}{n_x + n_y - 2}$$

476

477 Hotelling's t-squared statistic is suitable for measurements of statistical  
478 distance in the t-SNE-embedded space, as they were invariant to the distance  
479 scale. The distribution of  $t^2$  follows an  $F$ -distribution:

480

$$481 \quad t^2 \sim \frac{p(n_x + n_y - 2)}{n_x + n_y - p - 1} F_{p, n_x + n_y - 1 - p}$$

482

483 To normalize the distribution, the square root of  $t^2$  was defined as  $tNorm$   
484 and was used as the distance measurement in subsequent analyses:

485

$$486 \quad tNorm = \sqrt{t^2}$$

487

488 The vector representing the directional relationship between two classes was  
489 defined as  $tVec$ :

490

$$491 \quad tVec = tNorm \cdot \frac{\bar{x} - \bar{y}}{\|\bar{x} - \bar{y}\|}$$

492

493 Data points were divided into two classes: "Rest" and "Imagine" according to  
494 their relative times in the trials.  $tNorm$  and  $tVec$  were calculated for these two  
495 conditions.

496

#### 497 **4.9 Classifier plane**

498 To investigate the influence of BCI classifiers on the cortical adaptation in the t-  
499 SNE-embedded space, the classifier plane and classifier normal vector were  
500 linearly projected into the embedded space (See Figure 3C). The classifier vector  
501  $V = [v_1, v_2, v_3]^T$  was calculated as follows, where T denotes a matrix transpose.  
502

$$503 \quad X = \begin{pmatrix} 1 \\ \vdots \\ Y \\ 1 \end{pmatrix}, \quad \begin{pmatrix} d \\ \vec{v} \end{pmatrix} = X^{-1} X^T P \quad (2.9)$$

$$504 \quad V = \vec{v} / \|\vec{v}\|$$

505

506 Then, the equation of the classifier plane is given as follows.

507

$$508 \quad v_1 x + v_2 y + v_3 z + b = 0$$

509

510 assuming  $Y \in \mathbb{R}^{N \times 3}$  are the points in the 3D embedded space,  $P \in \mathbb{R}^{N \times n}$  are  
511 the original features referred to by the classifier, where  $N$  is the number of points,  
512 and  $n$  is the number of features.  $b$  is the intercept corresponding to the decision  
513 boundary of the classifiers.

514 As is shown in Figure 3D,  $tVec$  could be projected to the classifier vector to  
515 evaluate its positional relationship against the classifier. The lengths of projection  
516 on the classifier vector ( $tNorm_p$ ) and the angles between  $tVec$  and the classifier  
517 vector and ( $\theta_p$ ) were calculated against that of the model-based classifier to  
518 directly compare the adaptation processes across classifiers as follows:

519

$$520 \quad tNorm_p = tVec \cdot V$$

$$521 \quad \theta_p = \arccos \frac{tVec \cdot V}{\|tVec\|}$$

522

523 which represent the strength of scaling and deforming against the classifier plane,  
524 respectively.

525

#### 526 **4.10 EEG-similarity analysis**

527 Geometry-based analysis was conducted in the embedded space, as positional  
528 relationships of the points reflected the similarities in the original space. The

529 transition process from one brain condition to another (i.e., absence to presence  
530 of attempted movement) was assessed by the spatial arrangement and  
531 separability of points from the “Rest” and “Imagine” periods in the t-SNE  
532 dimension. Emergence of the two temporal phenomena were defined as follows:

533

- 534 • Scaling: The separability of the two conditions (Rest and Imagine)  
535 increases with respect to a fixed axis. Scaling is interpreted as the  
536 enhancement of specific cortical activity patterns.
- 537 • Deforming: The relationship of positions in the two conditions changes  
538 direction. Deforming is interpreted as an alteration of a cortical activity  
539 pattern that is adopted.

540

541 To quantify the two distinct adaptation process, the following metrics were  
542 defined. Scaling and deforming between the  $i^{\text{th}}$  and  $j^{\text{th}}$  sessions were quantified  
543 by  $tNorm_p$  and  $\theta_p$ .

544

- 545 • Scaling:  $\Delta tNorm_p = tNorm_p(i) - tNorm_p(j)$
- 546 • Deforming:  $\Delta\theta_p = \theta_p(i) - \theta_p(j)$

547

548 If adaptation progresses toward the targeted neural activity patterns required  
549 to control BCIs, the  $tNorm_p$  values should be larger while those of  $\theta_p$  should  
550 be smaller. Thus, the calculated values were subjected to the Wilcoxon sign-rank  
551 test to compare the differences between the first and last four sessions (early and  
552 late period, respectively). For adaptive classifiers, as the classifier plane was  
553 obtained from the 2nd session, the comparison was conducted from the 2nd  
554 session across all statistical tests. We then corrected the alpha-level with a  
555 Bonferroni correction.

556

## 557 **Acknowledgements**

558 This study was supported by the Keio Institute of Pure and Applied Sciences  
559 (KiPAS) research program, JSPS KAKENHI Grant Number 20H05923 (to J.U.)  
560 and JST, CREST Grant Number JPMJCR17A3 (to J.U.) including the AIP  
561 challenge program, Japan. We thank Yumiko Kakubari, Shoko Tonomoto and Aya  
562 Kamiya for their technical supports.

563

564 **Competing interests**

565 J.U. is a founder and Representative Director of the university startup company,  
566 Connect Inc. involved in the research, development, and sales of rehabilitation  
567 devices including brain-computer interfaces. He receives a salary from Connect  
568 Inc., and holds shares in Connect Inc. This company does not have any  
569 relationships with the device or setup used in the current study.

570

571 **References**

- 572 [1] Bassett, D. S., Yang, M., Wymbs, N. F., & Grafton, S. T. (2015). Learning-  
573 induced autonomy of sensorimotor systems. *Nature Neuroscience*, 18(5),  
574 744–751. <https://doi.org/10.1038/nn.3993>
- 575 [2] Benedek, M., Schickel, R. J., Jauk, E., Fink, A., & Neubauer, A. C. (2014).  
576 Alpha power increases in right parietal cortex reflects focused internal  
577 attention. *Neuropsychologia*, 56(1), 393–400.  
578 <https://doi.org/10.1016/j.neuropsychologia.2014.02.010>
- 579 [3] Benjamini, Y., & Hochberg, Y. (1995). Controlling the False Discovery Rate:  
580 A Practical and Powerful Approach to Multiple Testing. *Journal of the Royal*  
581 *Statistical Society: Series B*, 57(1), 289–300. [https://doi.org/10.1111/j.2517-](https://doi.org/10.1111/j.2517-6161.1995.tb02031.x)  
582 [6161.1995.tb02031.x](https://doi.org/10.1111/j.2517-6161.1995.tb02031.x)
- 583 [4] Bigdely-Shamlo, N., Mullen, T., Kothe, C., Su, K.-M., & Robbins, K. A.  
584 (2015). The PREP pipeline: standardized preprocessing for large-scale  
585 EEG analysis. *Frontiers in Neuroinformatics*, 9, 1–19.  
586 <https://doi.org/10.3389/fninf.2015.00016>
- 587 [5] Blankertz, B., Dornhege, G., Krauledat, M., Müller, K. R., & Curio, G.  
588 (2007). The non-invasive Berlin Brain-Computer Interface: Fast acquisition  
589 of effective performance in untrained subjects. *NeuroImage*, 37(2), 539–  
590 550. <https://doi.org/10.1016/j.neuroimage.2007.01.051>
- 591 [6] Buch, E., Weber, C., Cohen, L. G., Braun, C., Dimyan, M. A., Ard, T.,  
592 Mellinger, J., Caria, A., Soekadar, S., Fourkas, A., & Birbaumer, N. (2008).  
593 Think to move: A neuromagnetic brain-computer interface (BCI) system for  
594 chronic stroke. *Stroke*, 39(3), 910–917.  
595 <https://doi.org/10.1161/STROKEAHA.107.505313>
- 596 [7] Choi, Y., Shin, E. Y., & Kim, S. (2020). Spatiotemporal dissociation of fMRI  
597 activity in the caudate nucleus underlies human de novo motor skill  
598 learning. *Proceedings of the National Academy of Sciences of the United*

- 599 *States of America*, 117(38), 23886–23897.  
600 <https://doi.org/10.1073/pnas.2003963117>
- 601 [8] Corsi, M. C., Chavez, M., Schwartz, D., George, N., Hugueville, L., Kahn, A.  
602 E., Dupont, S., Bassett, D. S., & De Vico Fallani, F. (2020). Functional  
603 disconnection of associative cortical areas predicts performance during BCI  
604 training. *NeuroImage*, 209, 116500.  
605 <https://doi.org/10.1016/j.neuroimage.2019.116500>
- 606 [9] Cunningham, J. P., & Yu, B. M. (2014). Dimensionality reduction for large-  
607 scale neural recordings. *Nature Neuroscience*, 17(11), 1500–1509.  
608 <https://doi.org/10.1038/nn.3776>
- 609 [10] Delorme, A., & Makeig, S. (2004). EEGLAB: an open source toolbox for  
610 analysis of single-trial EEG dynamics. *Journal of Neuroscience Methods*,  
611 13, 9–21.
- 612 [11] Faul, F., Erdfelder, E., Lang, A. G., & Buchner, A. (2007). G\*Power 3: A  
613 flexible statistical power analysis program for the social, behavioral, and  
614 biomedical sciences. *Behavior Research Methods*, 39(2), 175–191.  
615 <https://doi.org/10.3758/BF03193146>
- 616 [12] Fries, P. (2005). A mechanism for cognitive dynamics: Neuronal  
617 communication through neuronal coherence. *Trends in Cognitive Sciences*,  
618 9(10), 474–480. <https://doi.org/10.1016/j.tics.2005.08.011>
- 619 [13] Fries, P. (2015). Rhythms for Cognition: Communication through  
620 Coherence. *Neuron*, 88(1), 220–235.  
621 <https://doi.org/10.1016/j.neuron.2015.09.034>
- 622 [14] Fujisawa, A., Kasuga, S., Suzuki, T., & Ushiba, J. (2019). Acquisition of a  
623 mental strategy to control a virtual tail via brain–computer interface.  
624 *Cognitive Neuroscience*, 10(1), 30–43.  
625 <https://doi.org/10.1080/17588928.2018.1426564>
- 626 [15] Gallego, J. A., Perich, M. G., Naufel, S. N., Ethier, C., Solla, S. A., & Miller,  
627 L. E. (2018). Cortical population activity within a preserved neural manifold  
628 underlies multiple motor behaviors. *Nature Communications*, 9(1), 1–13.  
629 <https://doi.org/10.1038/s41467-018-06560-z>
- 630 [16] Gruzelier, J. H. (2014). EEG-neurofeedback for optimising performance. III:  
631 A review of methodological and theoretical considerations. *Neuroscience*  
632 *and Biobehavioral Reviews*, 44, 159–182.  
633 <https://doi.org/10.1016/j.neubiorev.2014.03.015>

- 634 [17]Hayashi, M., Mizuguchi, N., Tsuchimoto, S., & Ushiba, J. (2020).  
635 Neurofeedback of scalp bi-hemispheric EEG sensorimotor rhythm guides  
636 hemispheric activation of sensorimotor cortex in the targeted hemisphere.  
637 *NeuroImage*, 223, 117298.  
638 <https://doi.org/10.1016/j.neuroimage.2020.117298>
- 639 [18]Hayashi, M., Tsuchimoto, S., Mizuguchi, N., Miyatake, M., Kasuga, S., &  
640 Ushiba, J. (2019). Two-stage regression of high-density scalp  
641 electroencephalograms visualizes force regulation signaling during muscle  
642 contraction. *Journal of Neural Engineering*, 16(5), 056020.  
643 <https://doi.org/10.1088/1741-2552/ab221a>
- 644 [19]Hotelling, H. (1992). *The Generalization of Student's Ratio* (pp. 54–65).  
645 Springer, New York, NY. [https://doi.org/10.1007/978-1-4612-0919-5\\_4](https://doi.org/10.1007/978-1-4612-0919-5_4)
- 646 [20]Hummel, F., Andres, F., Altenmüller, E., Dichgans, J., & Gerloff, C. (2002).  
647 Inhibitory control of acquired motor programmes in the human brain. *Brain*,  
648 125(2), 404–420. <https://doi.org/10.1093/brain/awf030>
- 649 [21]Imamizu, H., Miyauchi, S., Tamada, T., Sasaki, Y., Takino, R., Pütz, B.,  
650 Yoshioka, T., & Kawato, M. (2000). Human cerebellar activity reflecting an  
651 acquired internal model of a new tool. *Nature*, 403(6766), 192–195.  
652 <https://doi.org/10.1038/35003194>
- 653 [22]Karni, A., Meyer, G., Jezard, P., Adams, M. M., Turner, R., & Ungerleider,  
654 L. G. (1995). Functional MRI evidence for adult motor cortex plasticity  
655 during motor skill learning. *Nature*, 377(6545), 155–158.  
656 <https://doi.org/10.1038/377155a0>
- 657 [23]Kleim, J. A., Hogg, T. M., VandenBerg, P. M., Cooper, N. R., Bruneau, R., &  
658 Remple, M. (2004). Cortical Synaptogenesis and Motor Map Reorganization  
659 Occur during Late, but Not Early, Phase of Motor Skill Learning. *Journal of*  
660 *Neuroscience*, 24(3), 628–633. [https://doi.org/10.1523/JNEUROSCI.3440-](https://doi.org/10.1523/JNEUROSCI.3440-03.2004)  
661 03.2004
- 662 [24]Kober, S. E., Witte, M., Grinschgl, S., Neuper, C., & Wood, G. (2018).  
663 Placebo hampers ability to self-regulate brain activity: A double-blind sham-  
664 controlled neurofeedback study. *NeuroImage*, 181, 797–806.  
665 <https://doi.org/10.1016/j.neuroimage.2018.07.025>
- 666 [25]Kording, K. P., Tenenbaum, J. B., & Shadmehr, R. (2007). The dynamics of  
667 memory as a consequence of optimal adaptation to a changing body.  
668 *Nature Neuroscience*, 10(6), 779–786. <https://doi.org/10.1038/nn1901>

- 669 [26]Kothe, C. A., & Makeig, S. (2013). BCILAB: A platform for brain-computer  
670 interface development. *Journal of Neural Engineering*, 10(5), 56014–56031.  
671 <https://doi.org/10.1088/1741-2560/10/5/056014>
- 672 [27]Kraus, D., Naros, G., Bauer, R., Leão, M. T., Ziemann, U., & Gharabaghi, A.  
673 (2016). Brain-robot interface driven plasticity: Distributed modulation of  
674 corticospinal excitability. *NeuroImage*, 125, 522–532.  
675 <https://doi.org/10.1016/j.neuroimage.2015.09.074>
- 676 [28]Lee, J. A., & Verleysen, M. (2005). Nonlinear dimensionality reduction of  
677 data manifolds with essential loops. *Neurocomputing*, 67, 29–53.  
678 <https://doi.org/10.1016/j.neucom.2004.11.042>
- 679 [29]Lord, L. D., Expert, P., Atasoy, S., Roseman, L., Rapuano, K., Lambiotte,  
680 R., Nutt, D. J., Deco, G., Carhart-Harris, R. L., Kringelbach, M. L., & Cabral,  
681 J. (2019). Dynamical exploration of the repertoire of brain networks at rest is  
682 modulated by psilocybin. *NeuroImage*, 199, 127–142.  
683 <https://doi.org/10.1016/j.neuroimage.2019.05.060>
- 684 [30]Luu, P., & Ferree, T. (2005). Determination of the HydroCel Geodesic  
685 Sensor Nets' Average Electrode Positions and Their 10 – 10 International  
686 Equivalents. *EGI Technical Note, October*, 1–11.
- 687 [31]McFarland, D. J., McCane, L. M., David, S. V., & Wolpaw, J. R. (1997).  
688 Spatial filter selection for EEG-based communication.  
689 *Electroencephalography and Clinical Neurophysiology*, 103(3), 386–394.  
690 [https://doi.org/10.1016/S0013-4694\(97\)00022-2](https://doi.org/10.1016/S0013-4694(97)00022-2)
- 691 [32]Misselhorn, J., Friese, U., & Engel, A. K. (2019). Frontal and parietal alpha  
692 oscillations reflect attentional modulation of cross-modal matching. *Scientific*  
693 *Reports*, 9(1), 1–11. <https://doi.org/10.1038/s41598-019-41636-w>
- 694 [33]Naros, G., Lehnertz, T., Leão, M. T., Ziemann, U., & Gharabaghi, A. (2019).  
695 Brain State-dependent Gain Modulation of Corticospinal Output in the  
696 Active Motor System. *Cerebral Cortex*, 00, 1–11.  
697 <https://doi.org/10.1093/cercor/bhz093>
- 698 [34]Nudo, R. J., Milliken, G. W., Jenkins, W. M., & Merzenich, M. M. (1996).  
699 Use-dependent alterations of movement representations in primary motor  
700 cortex of adult squirrel monkeys. *Journal of Neuroscience*, 16(2), 785–807.  
701 <https://doi.org/10.1523/jneurosci.16-02-00785.1996>
- 702 [35]Palmer, J., Kreutz-Delgado, K., & Makeig, S. (2011). AMICA: An Adaptive  
703 Mixture of Independent Component Analyzers with Shared Components.  
704 *San Diego, CA: Technical Report, Swartz Center for Computational*



- 705 *Neuroscience, January*, 1–15.  
706 [http://sccn.ucsd.edu/~jason/amica\\_a.pdf%5Cnpapers2://publication/uuid/E6](http://sccn.ucsd.edu/~jason/amica_a.pdf%5Cnpapers2://publication/uuid/E6296FC1-7F6B-400C-85D0-3A292A27F710)  
707 [296FC1-7F6B-400C-85D0-3A292A27F710](http://sccn.ucsd.edu/~jason/amica_a.pdf%5Cnpapers2://publication/uuid/E6296FC1-7F6B-400C-85D0-3A292A27F710)
- 708 [36]Pfurtscheller, G., Brunner, C., Schlögl, A., & Lopes da Silva, F. H. (2006).  
709 Mu rhythm (de)synchronization and EEG single-trial classification of  
710 different motor imagery tasks. *NeuroImage*, 31(1), 153–159.  
711 <https://doi.org/10.1016/j.neuroimage.2005.12.003>
- 712 [37]Pfurtscheller, G., & Lopes Da Silva, F. H. (1999). Event-related EEG/MEG  
713 synchronization and desynchronization: basic principles. *Clinical*  
714 *Neurophysiology*, 110(11), 1842–1857. [https://doi.org/10.1016/S1388-](https://doi.org/10.1016/S1388-2457(99)00141-8)  
715 [2457\(99\)00141-8](https://doi.org/10.1016/S1388-2457(99)00141-8)
- 716 [38]Pion-Tonachini, L., Kreutz-Delgado, K., & Makeig, S. (2019). ICLabel: An  
717 automated electroencephalographic independent component classifier,  
718 dataset, and website. *NeuroImage*, 198, 181–197.  
719 <https://doi.org/10.1016/j.neuroimage.2019.05.026>
- 720 [39]Quallo, M. M., Price, C. J., Ueno, K., Asamizuya, T., Cheng, K., Lemon, R.  
721 N., & Iriki, A. (2009). Gray and white matter changes associated with tool-  
722 use learning in macaque monkeys. *Proceedings of the National Academy of*  
723 *Sciences of the United States of America*, 106(43), 18379–18384.  
724 <https://doi.org/10.1073/pnas.0909751106>
- 725 [40]Radhakrishnan, S. M., Baker, S. N., & Jackson, A. (2008). Learning a novel  
726 myoelectric-controlled interface task. *Journal of Neurophysiology*, 100(4),  
727 2397–2408. <https://doi.org/10.1152/jn.90614.2008>
- 728 [41]Ramot, M., Kimmich, S., Gonzalez-Castillo, J., Roopchansingh, V., Popal,  
729 H., White, E., Gotts, S. J., & Martin, A. (2017). Direct modulation of aberrant  
730 brain network connectivity through real-time NeuroFeedback. *ELife*, 6.  
731 <https://doi.org/10.7554/eLife.28974>
- 732 [42]Ruddy, K., Balsters, J., Mantini, D., Liu, Q., Kassraian-Fard, P., Enz, N.,  
733 Mihelj, E., Subhash Chander, B., Soekadar, S. R., & Wenderoth, N. (2018).  
734 Neural activity related to volitional regulation of cortical excitability. *ELife*, 7,  
735 21. <https://doi.org/10.7554/elife.40843>
- 736 [43]Sadtlir, P. T., Quick, K. M., Golub, M. D., Chase, S. M., Ryu, S. I., Tyler-  
737 Kabara, E. C., Yu, B. M., & Batista, A. P. (2014). Neural constraints on  
738 learning. *Nature*, 512(7515), 423–426. <https://doi.org/10.1038/nature13665>
- 739 [44]Schulz, H., Übelacker, T., Keil, J., Müller, N., & Weisz, N. (2014). Now i am  
740 ready - Now i am not: The influence of pre-TMS oscillations and

- 741 corticomuscular coherence on motor-evoked potentials. *Cerebral Cortex*,  
742 24(7), 1708–1719. <https://doi.org/10.1093/cercor/bht024>
- 743 [45] Shadmehr, R., & Mussa-Ivaldi, F. A. (1994). Adaptive representation of  
744 dynamics during learning of a motor task. *Journal of Neuroscience*, 14(5 II),  
745 3208–3224. <https://doi.org/10.1523/jneurosci.14-05-03208.1994>
- 746 [46] Shenoy, K. V., & Kao, J. C. (2021). Measurement, manipulation and  
747 modeling of brain-wide neural population dynamics. *Nature*  
748 *Communications*, 12(1), 1–5. <https://doi.org/10.1038/s41467-020-20371-1>
- 749 [47] Shibata, K., Watanabe, T., Sasaki, Y., & Kawato, M. (2011). Perceptual  
750 learning incepted by decoded fMRI neurofeedback without stimulus  
751 presentation. *Science*, 334(6061), 1413–1415.  
752 <https://doi.org/10.1126/science.1212003>
- 753 [48] Soekadar, S. R., Witkowski, M., Birbaumer, N., & Cohen, L. G. (2015).  
754 Enhancing Hebbian Learning to Control Brain Oscillatory Activity. *Cerebral*  
755 *Cortex*, 25(9), 2409–2415. <https://doi.org/10.1093/cercor/bhu043>
- 756 [49] Takemi, M., Masakado, Y., Liu, M., & Ushiba, J. (2013). Event-related  
757 desynchronization reflects downregulation of intracortical inhibition in  
758 human primary motor cortex. *Journal of Neurophysiology*, 110(5), 1158–  
759 1166. <https://doi.org/10.1152/jn.01092.2012>
- 760 [50] Telgen, S., Parvin, D., & Diedrichsen, J. (2014). Mirror reversal and visual  
761 rotation are learned and consolidated via separate mechanisms:  
762 Recalibrating or learning de novo? *Journal of Neuroscience*, 34(41), 13768–  
763 13779. <https://doi.org/10.1523/JNEUROSCI.5306-13.2014>
- 764 [51] Tomassini, A., Maris, E., Hilt, P., Fadiga, L., & D'Ausilio, A. (2020). Visual  
765 detection is locked to the internal dynamics of cortico-motor control. *PLOS*  
766 *Biology*, 18(10), e3000898. <https://doi.org/10.1371/journal.pbio.3000898>
- 767 [52] Tsuchimoto, S., Shibusawa, S., Iwama, S., Hayashi, M., Okuyama, K.,  
768 Mizuguchi, N., Kato, K., & Ushiba, J. (2021). Use of common average  
769 reference and large-Laplacian spatial-filters enhances EEG signal-to-noise  
770 ratios in intrinsic sensorimotor activity. *Journal of Neuroscience Methods*,  
771 353. <https://doi.org/10.1016/j.jneumeth.2021.109089>
- 772 [53] Van Der Maaten, L., Courville, A., Fergus, R., & Manning, C. (2014).  
773 Accelerating t-SNE using Tree-Based Algorithms. *Journal of Machine*  
774 *Learning Research*, 15, 3221–3245. <http://homepage.tudelft.nl/19j49/tsne>;
- 775 [54] Van Der Maaten, L., & Hinton, G. (2008). Visualizing data using t-SNE.  
776 *Journal of Machine Learning Research*, 9, 2579–2625.

- 777 [55]Wander, J. D., Blakely, T., Miller, K. J., Weaver, K. E., Johnson, L. A.,  
778 Olson, J. D., Fetz, E. E., Rao, R. P. N., & Ojemann, J. G. (2013). Distributed  
779 cortical adaptation during learning of a brain-computer interface task.  
780 *Proceedings of the National Academy of Sciences*, *110*(26), 10818–10823.  
781 <https://doi.org/10.1073/pnas.1221127110>
- 782 [56]Witte, M., Kober, S. E., & Wood, G. (2018). Noisy but not placebo: Defining  
783 metrics for effects of neurofeedback. *Brain*, *141*(5), e40.  
784 <https://doi.org/10.1093/brain/awy060>  
785

786 **Figure Legends**

787

788 **Figure 1 Conceptual illustration of neural adaptation process induced by**  
789 **brain-computer interfacing**

790 A: Setup of a brain-computer interface. Online acquired scalp  
791 electroencephalograms were fed into a classifier to detect the presence/absence  
792 of attempted movement. Predicted brain state was shown to participants as  
793 movement of visual object on display.

794 B: Conceptual visualization of cortical adaptation. Scaling adaptation reflects  
795 improvement in voluntary regulation of a specific component. If the centers of  
796 gravity determined from datapoints in two conditions are separated after brain-  
797 computer interfacing, it suggests the separability of two conditions is enhanced  
798 by adaptation. Deforming adaptation suggests that activity patterns are allocated  
799 to a specific brain state in order to adapt to the classifier. If the geometric  
800 relationships between two conditions are deformed with respect to a specific axis,  
801 it suggests the adaptation process progressed such that the two conditions are  
802 'separated along the axis.

803

804 **Figure 2 Temporal changes in acquired scores**

805 Group results of performance scores from users of model-based (A), adaptive (B),  
806 and *de novo* (C) classifiers. Solid lines indicate mean values while shaded areas  
807 represent 1 standard deviation across participants.

808

809 **Figure 2 Supplement 1**

810 A: Electrode locations. The three classifiers used in the study had different  
811 channels of interest. The model-based classifier used only channel C3 indicated  
812 in blue around the left sensorimotor cortex. The adaptive classifier used whole-  
813 head EEG channels (purple) to construct a common spatial pattern. The *de novo*  
814 classifier used only the Cz channel, shown here in green.

815 B: Experimental protocol and time course of a trial

816 C: Visual feedback object. For the model-based or adaptive classifiers, an  
817 illustration of a hand was shown that matched the attempted movements of the  
818 users while an illustration of a tail was used in the *de novo* task to encourage  
819 users to acquire novel mental actions that enhanced controllability of the BCI.

820

821 **Figure 2 Supplement 2**

822 Results of source estimation analysis from representative participants. The  
823 colored regions indicate voxels where activities were significantly different during  
824 Rest and Imagine periods ( $p < 0.05$  unc.). Areas colored with blue and green  
825 indicate those for model-based and *de novo* classifiers, respectively. While  
826 significant voxels were localized around the contralateral hemisphere of the  
827 imagined hand for the model-based classifier, those for the *de novo* classifier  
828 were located bilaterally, including in the pre/post central gyrus and supplementary  
829 motor area (peak voxel was in the postcentral gyrus, [MNI coordinates: -40, -25,  
830 45]). Note that a representative source estimation for the adaptive classifier is not  
831 shown due to variable activity patterns among participants.

832 sLoreta analyses of statistical non-parametric mapping for estimated cortical  
833 sources of band power in the alpha band (8-13 Hz). Areas colored with blue and  
834 green indicate those from model-based and *de novo* classifiers, respectively.  
835 Masks superimposed on a standard brain template were visualized by MRICroGL  
836 (<https://www.mccauslandcenter.sc.edu/mricrogl/home>).

837

### 838 **Figure 3 low dimensional visualization of EEG data by t-SNE**

839 A: Examples of t-SNE-based visualization of datasets from a representative  
840 participant in each classifier. Each axis represents results of the t-SNE analysis,  
841 which generates three axes from input data. Blue points represent data from the  
842 Imagine period and red ones are those from the Rest period.

843 B: Changes in geometric relationships between dataset and classifier plane. As  
844 training progressed, the geometric relationship of points from two brain states  
845 changed with respect to the classifier plane (black plane). The large points  
846 indicate the centers of gravity of points from each brain state. The black line  
847 orthogonal to the classifier plane is the classifier normal vector (see also Figure  
848 3D)

849 C: An example of t-SNE-based data visualization in embedded space (Model-  
850 based classifier user). Each datapoint is colored with its SMR-ERD value derived  
851 from the C3 electrode around the left sensorimotor cortex. The black plane  
852 represents the classifier plane (see also equation 2.9 for mathematical details).  
853 The large points indicate the centers of gravity of points from each brain state.  
854 The black line orthogonal to the classifier plane is the classifier normal vector  
855 (see also Figure 3D).

856 D: The t-SNE-based quantification of the adaptation process with respect to the  
857 classifier plane.  $tNorm_p$  is defined as a component of  $tVec$  with respect to the

858 classifier vector, while  $\theta_p$  is defined as a subtended angle between  $tVec$  and  
859 the classifier vector.

860

861 **Figure 4 Quantitative comparison of cortical adaptation processes in**  
862 **embedded space**

863 Changes over time in  $tNorm_p$  and  $\theta_p$  for participants operating under the  
864 model-based classifier (A), the *de novo* classifier (B), and the adaptive classifier  
865 (C).

866

867 **Figure 4 Supplement 1** Quantitative comparisons of cortical adaptation  
868 processes to the model-based classifier plane

869 Changes over time in  $tNorm_p$  (A) and  $\theta_p$  (B) of the model-based classifier for  
870 participants operating under the adaptive (left, purple) or *de novo* (right, green)  
871 classifiers.

872

873 **Figure 4 Supplement 2** Quantitative comparisons of cortical adaptation  
874 processes to the *de novo* classifier plane.

875 Changes over time in  $tNorm_p$  (left) and  $\theta_p$  (right) of the *de novo* classifier for  
876 participants operating under the model-based (A, blue) and adaptive (B, purple)  
877 classifiers.

878

879 **Figure 4 Supplement 3** Quantitative comparisons of cortical adaptation  
880 processes to the adaptive classifier plane.

881 Changes over time in  $tNorm_p$  (left) and  $\theta_p$  (right) of the adaptive classifier for  
882 participants operating under the model-based (A, blue) and *de novo* (B, green)  
883 classifiers.

884

885 **Supplementary Material for: *De novo* brain-computer interfacing deforms**  
886 **manifold of population activity patterns of human cerebral cortex**  
887

888 **Detailed procedure for construction of adaptive classifier**

889 In the experiments with the adaptive classifier, six spatial filters were generated  
890 via the common spatial pattern algorithm during the intervals between sessions.  
891 Filters that maximized variance differences were generated via the CSP algorithm  
892 and applied to the online EEG signals during the subsequent session. The log-  
893 transformed variances of the six-channel, spatial-filtered data from the previous  
894 1-s signals were calculated and classified with a linear SVM classifier.

895 Cross validation results of the adaptive decoder are shown in Figure S1A. Data  
896 from a single session were used for training and data from the remaining sessions  
897 were used for testing. Performance, evaluated from the coefficients of linear  
898 regression, did not show systematic improvement at the group level ( $p = 0.078$ ,  
899 Wilcoxon sign-rank test). Figure S1 B shows the results of a cross validation test  
900 using a single session for training and another for testing, suggesting there was  
901 an increase in accuracy during the later period, which was confirmed by temporal  
902 changes in the acquired score (Figure 2B).  
903

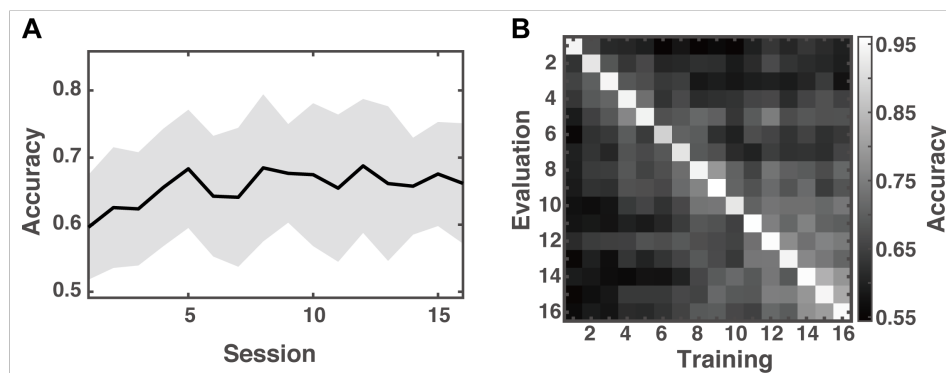

904  
905 Figure S1. Temporal changes in cross validation performance of adaptive  
906 decoder

907  
908 **Cortical source estimation analysis for EEG signals**

909 For the data from participants who operated under the model-based or *de novo*  
910 decoders, band-power in the alpha-band was subjected to sLORETA analysis for  
911 cortical source estimation (Pascual-Marqui, 2002). Because the motivation for  
912 conducting the source analysis was to test whether the targeted region of the

913 classifier was successfully activated during the late period of BCI training,  
914 averaged data from across the last four sessions were subjected to a non-  
915 parametric permutation test (Nichols & Holmes, 2002).

916

### 917 **Mathematical description of t-SNE algorithm**

918 In the original manuscript describing the t-SNE algorithm (Van Der Maaten &  
919 Hinton, 2008), the datapoints are described as  $\mathbf{x} = (x_1, x_2, \dots, x_n)$ , where  $x_i$  is a  
920 vector with the arbitrary number of features. Assume that  $x_i$  and  $x_j$  are two data  
921 points,  $d_{ij}$  is the distance between the two points and  $p_{j|i}$  is the probability that  
922  $x_i$  and  $x_j$  are neighbors. The probabilities follow a Gaussian distribution,  
923 described by:

924

$$925 \quad p_{j|i} = \frac{\exp(-d_{ij}^2/2\sigma_i^2)}{\sum_{k \neq i} \exp(-d_{ik}^2/2\sigma_i^2)}, \quad p_{i|i} = 0$$

926

927 where  $\sigma_i$  is determined by the parameter *perplexity*, the value of which was  
928 calculated with  $H$ :

929

$$930 \quad \text{perplexity}(P_i) = 2^{H(P_i)}$$
$$931 \quad H(P_i) = - \sum_j p_{j|i} \log_2 p_{j|i}$$

932

933 The value of  $\sigma_i$  is adjusted in a binary search method so that *perplexity* matches  
934 a value determined by the user. According to Van Der Maaten & Hinton (2008),  
935 perplexity is a smooth measure of the effective number of neighbors. The joint  
936 probability  $p_{ij}$  is defined by symmetrizing the conditional probabilities:

937

$$938 \quad p_{ij} = \frac{p_{j|i} + p_{i|j}}{2N},$$

939

940 where  $N$  is the number of data points. The pairwise distances between points in  
941 low-dimensional embedding were converted to possibilities that follow a Student's  
942 t-distribution with one degree of freedom. Assume that  $y_i$  and  $y_j$  are two data  
943 points in the embedded space and joint possibilities  $q_{ij}$  are defined as:

944



945 
$$q_{ij} = \frac{(1 + d_{ij}^2)^{-1}}{\sum_{k \neq l} (1 + d_{kl}^2)^{-1}}$$

946

947 The Kullback-Liebler (KL) divergence between joint possibility distribution  $P$  in  
948 the original space and  $Q$  in embedded space was then calculated with:

949

950 
$$KL(P||Q) = \sum_i \sum_j p_{ij} \log \frac{p_{ij}}{q_{ij}}$$

951

952 The KL divergence was minimized via a gradient descent method by adjusting  
953 the positions of points in the embedded space.

954

## 955 **References**

956 [1] Nichols, T. E., & Holmes, A. P. (2002). Nonparametric permutation tests for  
957 functional neuroimaging: a primer with examples. *Human brain mapping*,  
958 15(1), 1–25. <https://doi.org/10.1002/hbm.1058>

959 [2] Pascual-Marqui, R. D. (2002). Standardized low-resolution brain  
960 electromagnetic tomography (sLORETA): Technical details. *Methods and*  
961 *Findings in Experimental and Clinical Pharmacology*, 24(SUPPL. D), 5–12.

962 [3] Van Der Maaten, L., & Hinton, G. (2008). Visualizing data using t-SNE.  
963 *Journal of Machine Learning Research*, 9, 2579–2625.

964
